# Supplementary material
Source: Springer Nature journal article supplement (https://www.springermedizin.de/resource/supplementary/12985_2012_1990_MOESM1_ESM.pdf/9610810)

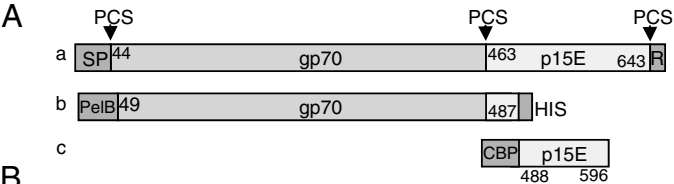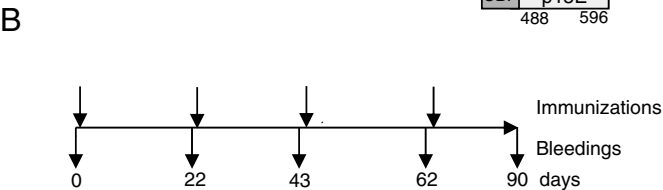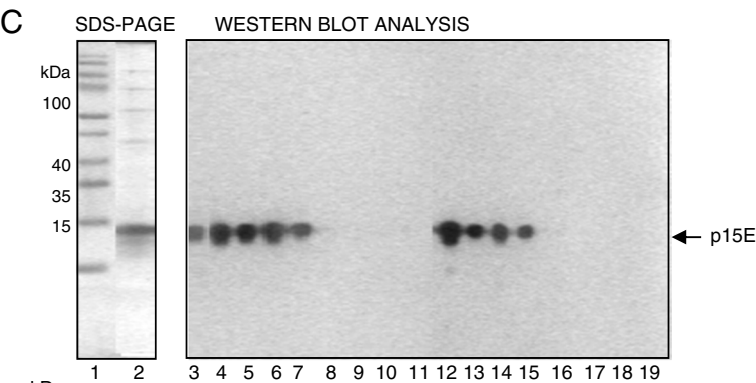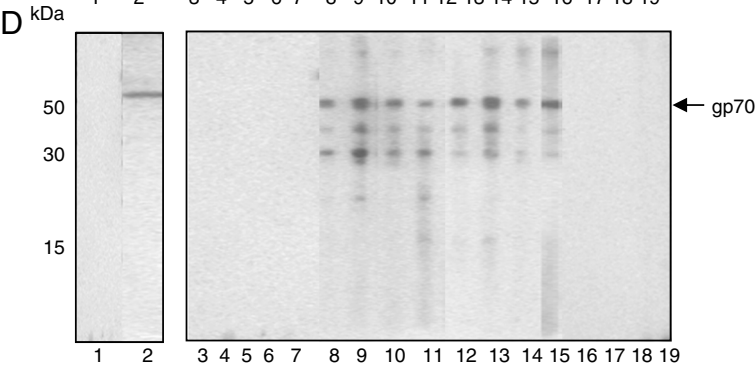

Supplement: MOESM1 [file 9610810]
